# Supplementary material for: Comprehensive Analysis of Long Non-Coding RNAs in Ovarian Cancer Reveals Global Patterns and Targeted DNA Amplification
Source: PubMed Central journal article supplement (PMC3827191; doi:10.1371/journal.pone.0080306), 2013-11-12
Supplement: pone.0080306.s001.pdf [file pone.0080306.s001.pdf]

## SUPPORTING INFORMATION

## Supporting figures

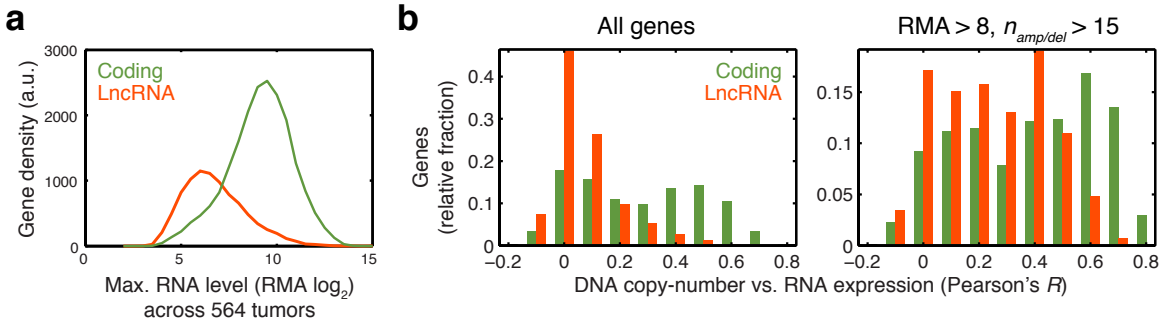

**Supplementary Figure 1. Global patterns of lncRNA expression vs. copy-number variation in ovarian adenocarcinomas based on HuEx 1.0ST expression arrays.** **a**, Distributions of lncRNA and coding gene expression levels (maximum signal in all tumors, as determined by the Affymetrix RMA algorithm). **b**, Histograms of correlations between DNA copy-number and RNA level (based on 481 tumors with dual data). Left panel: lncRNAs overall (left panel,  $n = 8,478$ ), showing lower correlations compared to coding genes. Right panel: improved correlations when considering genes expressed at RMA level > 8 (top 21% lncRNAs,  $n = 1754$ ) that were also amplified or deleted in >15 samples (right panel,  $n = 146$ ).

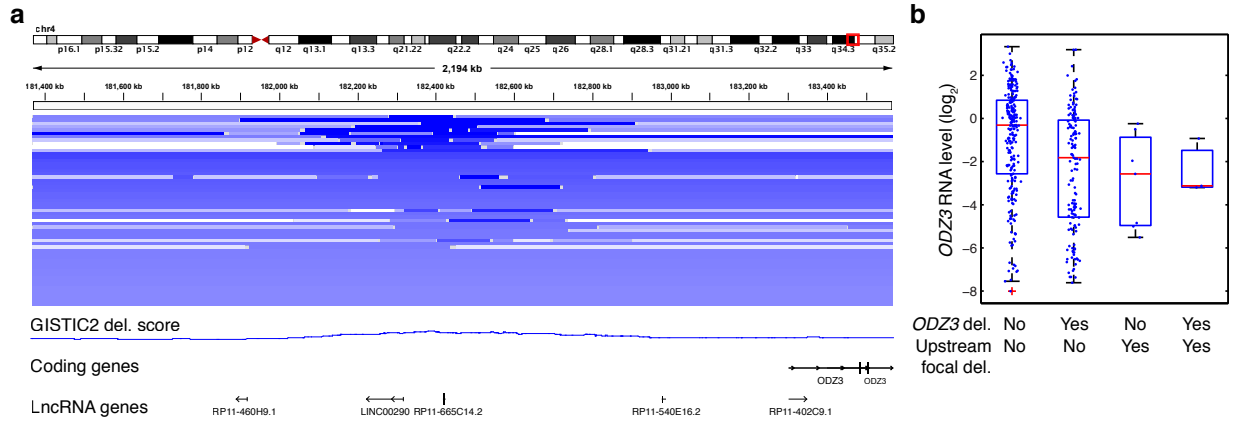

**Supplementary Figure 2. Focal deletion on 4q34.2.** **a**, An intergenic focally deleted region, pinpointed by GISTIC analysis, harbors lncRNAs RP11-665C14.2 and, slightly off-center, LINC00290. However, RNA-seq data did not reveal convincing expression of these genes or other candidates. **b**, Focal deletions are associated with reduced expression of the downstream *ODZ3* gene, even when *ODZ3* is not by itself copy-number reduced (a log<sub>2</sub> threshold of -0.4 was here used to define deleted samples). This is compatible with the deleted segments being part of a regulatory region required for *ODZ3* transcriptional activation, acting at ~1 Mb distance.

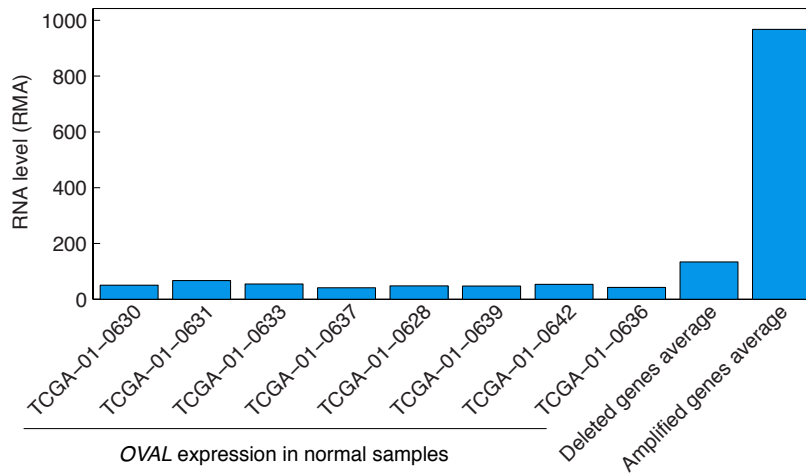

**Supplementary Figure 3. OVAL expression in normal samples.** OVAL expression was assayed in 8 normal fallopian tube samples using TCGA Affymetrix Exon 1.0ST data. The average linear RMA value was 50.8, to be compared with 134.0 for homozygously deleted genes ( $\log_2$  CNA < -3) and 967.4 for amplified genes ( $\log_2$  CNA > 3).

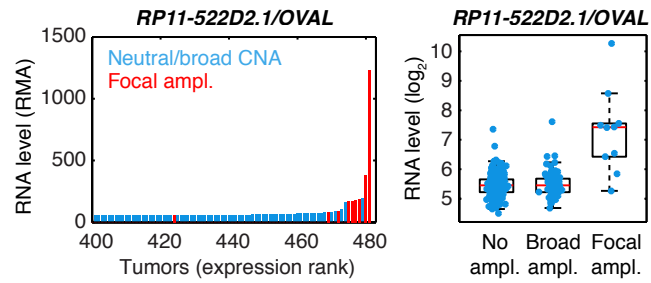

**Supplementary Figure 4. OVAL focal amplification correlates with transcriptional activation.** Affymetrix Exon 1.0ST data mirrors results obtained using RNA-seq: OVAL RNA is low or undetectable in most tumors, and induced specifically in focally amplified cases.

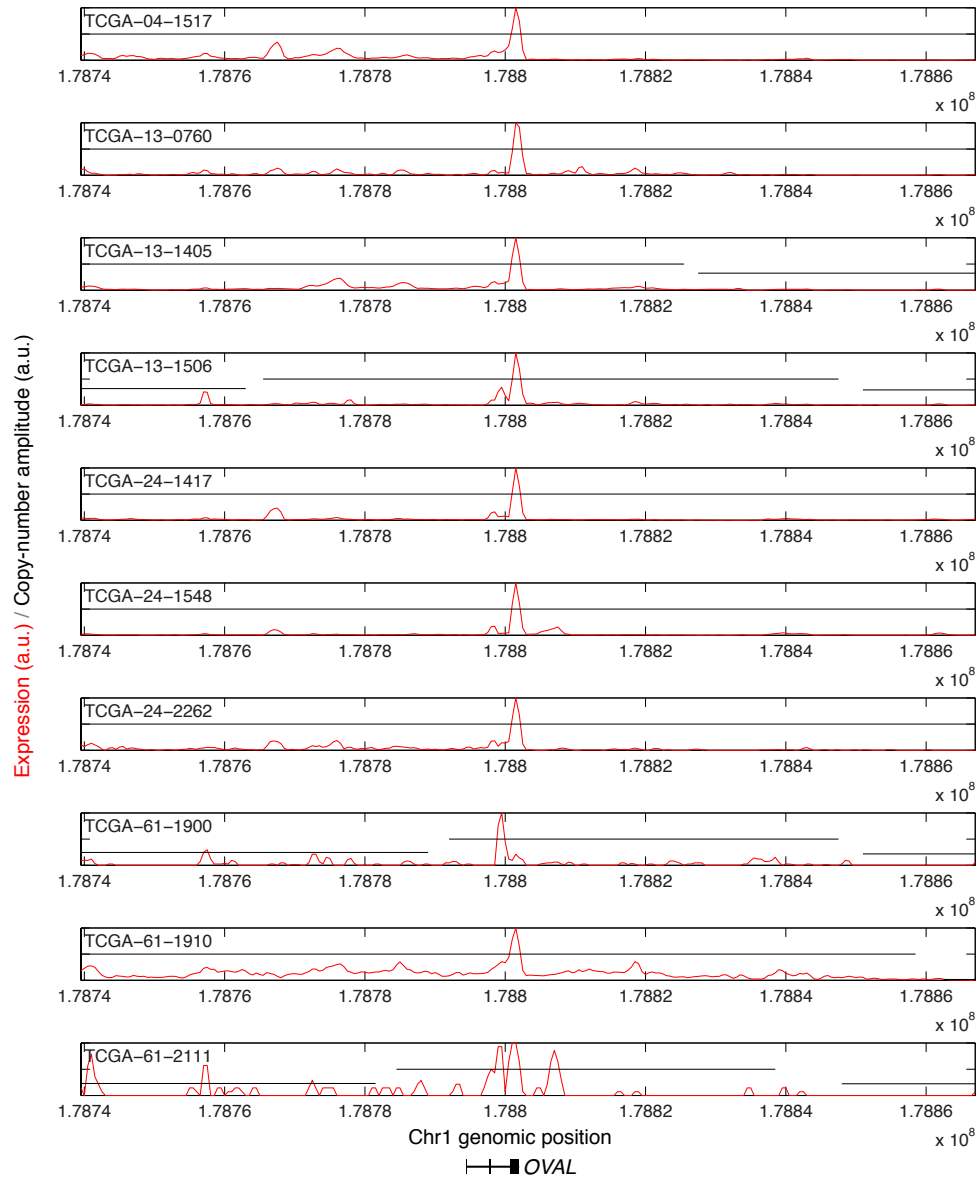

**Supplementary Figure 5. Read density and copy-number amplitude in AXI region focally amplified samples.** The plots show normalized read density (based on reads counts aggregated per 1000 nt segment) and copy-number patterns in tumors with marked AXI focal amplification (relative CNA > 0.4 as defined in Methods).

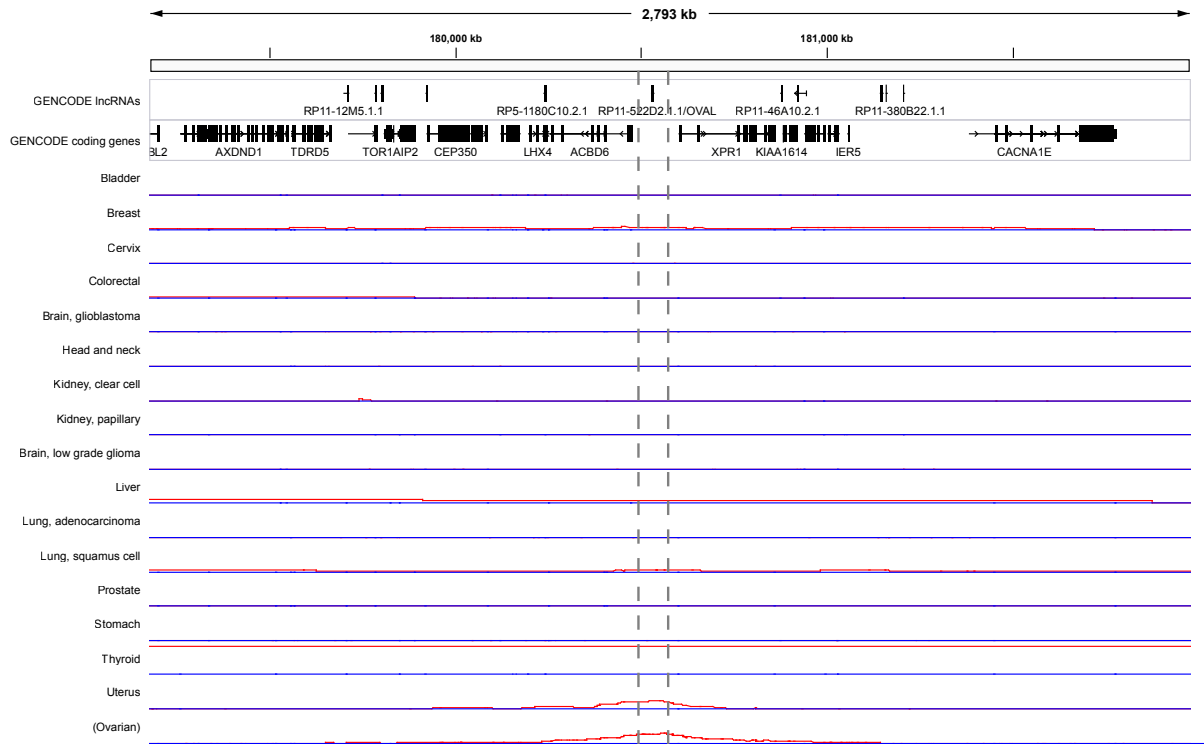

**Supplementary Figure 6. Focal scores in the OVAL locus on chromosome 1 in 16 additional cancers.** GISTIC scores for focal amplification/deletion were investigated in the OVAL locus. All TCGA cancers with at least 50 tumors at the time of download (Sep 2012, total 16) were considered. Genome coordinates in this figure refer to the Hg19 build. Endometrial tumors (Uterus) show a marked peak at the OVAL locus, similar to ovarian tumors (included for comparison).

## Supporting tables

| Differentiated |                   |            |                 | Immunoreactive |                   |            |                  | Mesenchymal |                    |            |                 | Proliferative |                    |            |                  |
|----------------|-------------------|------------|-----------------|----------------|-------------------|------------|------------------|-------------|--------------------|------------|-----------------|---------------|--------------------|------------|------------------|
| t-stat         | GENCODE           | 11 gene ID | Symbol          | t-stat         | GENCODE           | 11 gene ID | Symbol           | t-stat      | GENCODE            | 11 gene ID | Symbol          | t-stat        | GENCODE            | 11 gene ID | Symbol           |
| 4.14           | ENSG00000225298.1 |            | LINC00113       | 4.28           | ENSG00000223387.2 |            | RP11-408H1.3.1   | 4.41        | ENSG00000100181.15 |            | TPTEP1          | 4.32          | ENSG00000174365.14 |            | SNHG11           |
| 4.83           | ENSG00000234142.1 |            | RP11-276E17.2.1 | 4.54           | ENSG00000227017.1 |            | AC007036.6.1     | 8.58        | ENSG00000223485.1  |            | RP11-417E7.1.1  | 4.11          | ENSG00000178248.10 |            | AP000345.1.1     |
| 4.20           | ENSG00000240859.1 |            | AC093627.10.1   | 4.11           | ENSG00000231669.1 |            | RP11-368D24_A.1  | 4.09        | ENSG00000224514.1  |            | AC093611.1.1    | 6.73          | ENSG00000178947.7  |            | LINC00086        |
| 4.33           | ENSG00000258647.1 |            | RP11-304N14.2.1 | 4.62           | ENSG00000232310.1 |            | RP11-557H15.4.1  | 4.76        | ENSG00000225383.1  |            | SFTA1P          | 4.89          | ENSG00000179935.5  |            | RP5-1068E13.3.1  |
| -4.20          | ENSG00000226674.1 |            | AC074093.1.1    | 5.68           | ENSG00000232756.1 |            | RP5-1185I7.1.1   | 6.25        | ENSG00000225783.2  |            | MIAT            | 4.99          | ENSG00000203739.3  |            | RP11-296O14.3.1  |
| -4.11          | ENSG00000249685.1 |            | RP11-360F5.3.1  | 4.85           | ENSG00000233535.1 |            | RP1-122K4.2.1    | 4.24        | ENSG00000226791.2  |            | AC109826.1.1    | 4.67          | ENSG00000205611.3  |            | RP4-610C12.4.1   |
|                |                   |            |                 | 5.50           | ENSG00000235304.1 |            | RP11-265P11.2.1  | 5.19        | ENSG00000227082.1  |            | AL592494.5.1    | 5.82          | ENSG00000205634.1  |            | RP11-191L9.6.1   |
|                |                   |            |                 | 4.30           | ENSG00000236389.1 |            | RP1-287H17.1.1   | 6.47        | ENSG00000227579.1  |            | RP1-35C21.2.1   | 4.18          | ENSG00000205673.1  |            | AP000569.2.1     |
|                |                   |            |                 | 4.47           | ENSG00000236700.1 |            | RP11-557H15.2.1  | 13.19       | ENSG00000229720.1  |            | RP3-495K2.2.1   | 5.48          | ENSG00000214039.3  |            | RP11-474D1.3.1   |
|                |                   |            |                 | 5.09           | ENSG00000246084.2 |            | CTD-2506I14.1.1  | 4.84        | ENSG00000230499.1  |            | AC108463.1.1    | 5.40          | ENSG00000215866.2  |            | RP11-426I16.8.1  |
|                |                   |            |                 | 4.02           | ENSG00000249096.1 |            | RP11-290F5.1.1   | 6.20        | ENSG00000231133.1  |            | HAR1B           | 6.11          | ENSG00000223393.1  |            | RP5-858B6.3.1    |
|                |                   |            |                 | 4.44           | ENSG00000253417.1 |            | RP11-109J4.1.1   | 4.65        | ENSG00000232679.1  |            | RP11-400N13.3.1 | 4.88          | ENSG00000223486.1  |            | AC092198.1.1     |
|                |                   |            |                 | 4.14           | ENSG00000259641.1 |            | RP11-279F6.3.1   | 9.92        | ENSG00000233521.1  |            | RP5-1172A22.1.1 | 5.03          | ENSG00000223546.2  |            | LLOCNC01-157D4.1 |
|                |                   |            |                 | -4.48          | ENSG00000179219.5 |            | LINC00311        | 4.48        | ENSG00000235565.1  |            | RP11-86H7.7.1   | 4.10          | ENSG00000223764.1  |            | RP11-5407.3.1    |
|                |                   |            |                 | -4.98          | ENSG00000223403.2 |            | AL132709.7.1     | 5.37        | ENSG00000235770.1  |            | AC122136.1.1    | 4.74          | ENSG00000224167.1  |            | RP3-522D1.1.1    |
|                |                   |            |                 | -4.04          | ENSG00000224413.1 |            | AP001476.2.1     | 4.86        | ENSG00000235884.2  |            | RP11-77I22.3.1  | 4.45          | ENSG00000225009.1  |            | AC066509.6.1     |
|                |                   |            |                 | -4.30          | ENSG00000225746.3 |            | AL132709.5.1     | 4.61        | ENSG00000236819.1  |            | AC087393.1.1    | 5.27          | ENSG00000225156.2  |            | AC012354.6.1     |
|                |                   |            |                 | -4.15          | ENSG00000231720.1 |            | RP11-568A7.3.1   | 4.52        | ENSG00000244758.1  |            | AC093627.6.1    | 4.40          | ENSG00000225173.1  |            | XXbac-BPG308K3.5 |
|                |                   |            |                 | -4.57          | ENSG00000238276.1 |            | RP11-245J24.1.1  | 9.30        | ENSG00000248870.1  |            | CTD-2015A6.2.1  | 4.56          | ENSG00000225882.1  |            | RP3-410B11.1.1   |
|                |                   |            |                 | -4.04          | ENSG00000248441.2 |            | CTD-2536I1.1.1   | 4.28        | ENSG00000250334.1  |            | RP11-234K19.2.1 | 4.34          | ENSG00000223546.2  |            | AC003088.1.1     |
|                |                   |            |                 | -4.24          | ENSG00000255983.1 |            | RP11-1038A11.1.1 | 5.39        | ENSG00000253163.1  |            | RP11-443C10.1.1 | 4.91          | ENSG00000227060.1  |            | AC004383.5.1     |
|                |                   |            |                 | -4.11          | ENSG00000257151.1 |            | RP11-701H24.2.1  | 4.15        | ENSG00000253688.1  |            | RP11-567J20.2.1 | 4.37          | ENSG00000227165.1  |            | RP11-323P17.1.1  |
|                |                   |            |                 | -4.21          | ENSG00000260054.1 |            | RP11-611I7.1.1   | 7.45        | ENSG00000253746.1  |            | RP11-527N22.2.1 | 4.35          | ENSG00000227885.1  |            | RP11-79N23.1.1   |
|                |                   |            |                 | -4.16          | ENSG00000260804.1 |            | RP11-566E18.3.1  | 5.21        | ENSG00000253983.1  |            | RP1-16A9.1.1    | 4.38          | ENSG00000228271.1  |            | RP11-513G11.2.1  |
|                |                   |            |                 | -4.08          | ENSG00000261754.1 |            | CTC-523E23.1.1   | 7.28        | ENSG00000254605.1  |            | RP11-626H12.2.1 | 5.10          | ENSG00000228709.1  |            | AP001065.15.1    |
|                |                   |            |                 |                |                   |            |                  | 4.08        | ENSG00000255191.1  |            | RP11-626H12.1.1 | 4.13          | ENSG00000228784.1  |            | AC013400.2.1     |
|                |                   |            |                 |                |                   |            |                  | 9.76        | ENSG00000259811.1  |            | RP11-863P13.3.1 | 5.40          | ENSG00000229151.1  |            | RP11-348F1.3.1   |
|                |                   |            |                 |                |                   |            |                  | 7.96        | ENSG00000259847.1  |            | RP11-95H3.1.1   | 5.38          | ENSG00000230294.3  |            | RP13-507P19.2.1  |
|                |                   |            |                 |                |                   |            |                  | 4.98        | ENSG00000260454.1  |            | RP11-367F23.2.1 | 4.46          | ENSG00000230725.1  |            | RP4-738P15.1.1   |
|                |                   |            |                 |                |                   |            |                  | 4.99        | ENSG00000260578.1  |            | CTD-2541I13.1.1 | 5.01          | ENSG00000231327.1  |            | AC016700.5.1     |
|                |                   |            |                 |                |                   |            |                  | 6.83        | ENSG00000260868.1  |            | RP11-394I13.1.1 | 4.57          | ENSG00000231772.1  |            | RP1-154K9.2.1    |
|                |                   |            |                 |                |                   |            |                  | 9.87        | ENSG00000261327.1  |            | RP11-863P13.7.1 | 4.00          | ENSG00000231976.3  |            | RP13-16H11.1.1   |
|                |                   |            |                 |                |                   |            |                  | 9.51        | ENSG00000261742.1  |            | RP11-256I9.1.1  | 4.31          | ENSG00000232006.1  |            | AC005537.2.1     |
|                |                   |            |                 |                |                   |            |                  | -4.50       | ENSG00000224843.1  |            | LINC00240       | 4.09          | ENSG00000233396.1  |            | RP11-458D21.1.1  |
|                |                   |            |                 |                |                   |            |                  | -4.22       | ENSG00000227544.1  |            | AC018647.3.1    | 4.40          | ENSG00000233723.2  |            | AC007092.1.1     |
|                |                   |            |                 |                |                   |            |                  | -4.14       | ENSG00000233256.1  |            | RP11-445K13.2.1 | 4.10          | ENSG00000233757.2  |            | AC092835.2.1     |
|                |                   |            |                 |                |                   |            |                  | -4.56       | ENSG00000234062.3  |            | RP11-308D16.4.1 | 4.66          | ENSG00000233775.1  |            | RP4-811H24.9.1   |
|                |                   |            |                 |                |                   |            |                  | -4.13       | ENSG00000235475.1  |            | RP11-166O4.5.1  | 4.12          | ENSG00000234261.1  |            | RP11-146J2.1.1   |
|                |                   |            |                 |                |                   |            |                  | -4.53       | ENSG00000239467.1  |            | AC007405.6.1    | 4.45          | ENSG00000234928.1  |            | AP000344.3.1     |
|                |                   |            |                 |                |                   |            |                  | -4.10       | ENSG00000244345.1  |            | RP11-654C22.2.1 | 7.07          | ENSG00000235049.1  |            | RP5-1096O14.2.1  |
|                |                   |            |                 |                |                   |            |                  | -4.02       | ENSG00000251381.2  |            | CTC-497E21.4.1  | 4.82          | ENSG00000236377.1  |            | AC084809.3.1     |
|                |                   |            |                 |                |                   |            |                  | -4.38       | ENSG00000256084.1  |            | RP11-134N1.2.1  | 4.27          | ENSG00000236914.3  |            | RP11-1008C21.2.1 |
|                |                   |            |                 |                |                   |            |                  | -4.17       | ENSG00000258946.1  |            | RP11-58E21.4.1  | 6.06          | ENSG00000236989.1  |            | AC142119.1.1     |
|                |                   |            |                 |                |                   |            |                  | -5.29       | ENSG00000261455.1  |            | RP5-1129J21.3.1 | 4.42          | ENSG00000237438.1  |            | CECR7            |
|                |                   |            |                 |                |                   |            |                  |             |                    |            |                 | 4.25          | ENSG00000237751.2  |            | AC007040.5.1     |
|                |                   |            |                 |                |                   |            |                  |             |                    |            |                 | 4.16          | ENSG00000238113.1  |            | RP11-262H14.1.1  |
|                |                   |            |                 |                |                   |            |                  |             |                    |            |                 | 5.15          | ENSG00000248740.1  |            | RP11-328K4.1.1   |
|                |                   |            |                 |                |                   |            |                  |             |                    |            |                 | 4.40          | ENSG00000249352.2  |            | RP11-141O11.2.1  |
|                |                   |            |                 |                |                   |            |                  |             |                    |            |                 | 4.53          | ENSG00000250519.2  |            | RP11-680H20.2.1  |
|                |                   |            |                 |                |                   |            |                  |             |                    |            |                 | 4.04          | ENSG00000251600.1  |            | RP11-673E1.1.1   |
|                |                   |            |                 |                |                   |            |                  |             |                    |            |                 | 5.02          | ENSG00000253361.1  |            | RP11-675F6.3.1   |
|                |                   |            |                 |                |                   |            |                  |             |                    |            |                 | 4.89          | ENSG00000256209.1  |            | RP11-897M7.1.1   |
|                |                   |            |                 |                |                   |            |                  |             |                    |            |                 | 4.21          | ENSG00000256232.1  |            | RP11-771K4.1.1   |
|                |                   |            |                 |                |                   |            |                  |             |                    |            |                 | 7.12          | ENSG00000257698.1  |            | RP11-620U15.3.1  |
|                |                   |            |                 |                |                   |            |                  |             |                    |            |                 | 4.03          | ENSG00000258131.1  |            | RP11-541G9.1.1   |
|                |                   |            |                 |                |                   |            |                  |             |                    |            |                 | 4.40          | ENSG00000258548.1  |            | RP11-572M18.1.1  |
|                |                   |            |                 |                |                   |            |                  |             |                    |            |                 | 4.82          | ENSG00000258592.1  |            | RP11-108M12.3.1  |
|                |                   |            |                 |                |                   |            |                  |             |                    |            |                 | 5.18          | ENSG00000260100.1  |            | RP11-220I1.5.1   |
|                |                   |            |                 |                |                   |            |                  |             |                    |            |                 | 4.12          | ENSG00000260163.1  |            | RP11-521O16.2.1  |
|                |                   |            |                 |                |                   |            |                  |             |                    |            |                 | 4.34          | ENSG00000260664.1  |            | AC004158.3.1     |
|                |                   |            |                 |                |                   |            |                  |             |                    |            |                 | -4.41         | ENSG00000214049.3  |            | UCA1             |
|                |                   |            |                 |                |                   |            |                  |             |                    |            |                 | -4.86         | ENSG00000224164.1  |            | RP3-369A17.4.1   |
|                |                   |            |                 |                |                   |            |                  |             |                    |            |                 | -5.72         | ENSG00000224307.1  |            | RP11-344B5.2.1   |
|                |                   |            |                 |                |                   |            |                  |             |                    |            |                 | -4.71         | ENSG00000228221.1  |            | RP11-335I9.1.1   |
|                |                   |            |                 |                |                   |            |                  |             |                    |            |                 | -4.91         | ENSG00000229051.1  |            | RP5-952N6.1.1    |
|                |                   |            |                 |                |                   |            |                  |             |                    |            |                 | -4.34         | ENSG00000233901.1  |            | RP11-65J3.1.1    |
|                |                   |            |                 |                |                   |            |                  |             |                    |            |                 | -5.53         | ENSG00000237797.1  |            | RP11-472N13.3.1  |
|                |                   |            |                 |                |                   |            |                  |             |                    |            |                 | -4.15         | ENSG00000238042.1  |            | RP11-815M8.1.1   |
|                |                   |            |                 |                |                   |            |                  |             |                    |            |                 | -5.52         | ENSG00000239795.1  |            | AC109826.2.1     |
|                |                   |            |                 |                |                   |            |                  |             |                    |            |                 | -4.48         | ENSG00000242147.1  |            | RP13-463N16.6.1  |
|                |                   |            |                 |                |                   |            |                  |             |                    |            |                 | -6.36         | ENSG00000244459.2  |            | RP11-1398P2.1.1  |
|                |                   |            |                 |                |                   |            |                  |             |                    |            |                 | -4.82         | ENSG00000245532.2  |            | NEAT1            |
|                |                   |            |                 |                |                   |            |                  |             |                    |            |                 | -4.49         | ENSG00000248323.1  |            | RP11-213H15.3.1  |
|                |                   |            |                 |                |                   |            |                  |             |                    |            |                 | -4.21         | ENSG00000248846.2  |            | CTD-2016O11.1.1  |
|                |                   |            |                 |                |                   |            |                  |             |                    |            |                 | -4.07         | ENSG00000254288.1  |            | RP11-612.3.1     |
|                |                   |            |                 |                |                   |            |                  |             |                    |            |                 | -4.32         | ENSG00000258689.1  |            | RP6-65G23.1.1    |
|                |                   |            |                 |                |                   |            |                  |             |                    |            |                 | -4.12         | ENSG00000259252.2  |            | RP11-1008C21.1.1 |

**Supplementary Table 1.** Intergenic lncRNAs that are transcriptionally induced (t-statistic > 4) or repressed (t-statistic < 4) exclusively in one of four previously defined expression subtypes.

| Wide peak coordinates     | Peak width | Type | Residual q | LncRNAs | Coding | LncRNAs in wide peak                                                         | Coding genes in wide peak                   |
|---------------------------|------------|------|------------|---------|--------|------------------------------------------------------------------------------|---------------------------------------------|
| chr4:182346394-182458181  | 111787     | Del  | 2.20E-31   | 1       | 0      | RP11-665C14.2.1,                                                             |                                             |
| chr1:178780208-178854243  | 74035      | Amp  | 1.97E-02   | 1       | 0      | RP11-522D2.1.1,                                                              |                                             |
| chr3:170150840-170280412  | 129572     | Amp  | 3.28E-56   | 1       | 0      | RP11-152C17.1.1,                                                             | MECOM*,                                     |
| chr6:57457872-58401277    | 943405     | Del  | 1.07E-04   | 3       | 1      | GUSBP4, XXbac-<br>BPG55C20.7.1, RP11-<br>343D24.2.1,                         | PRIM2,                                      |
| chr17:21144429-21206026   | 61597      | Del  | 2.68E-25   | 0       | 1      |                                                                              | MAP2K3,                                     |
| chr10:89701287-89711736   | 10449      | Del  | 5.41E-11   | 0       | 1      |                                                                              | PTEN,                                       |
| chr17:26532345-26568338   | 35993      | Del  | 6.58E-08   | 0       | 1      |                                                                              | NF1,                                        |
| chr16:77190685-77350206   | 159521     | Del  | 1.15E-02   | 0       | 1      |                                                                              | WWOX,                                       |
| chr16:87965263-88055649   | 90386      | Del  | 1.08E-02   | 0       | 1      |                                                                              | ANKRD11,                                    |
| chr3:117999463-118098130  | 98667      | Del  | 7.18E-04   | 0       | 1      |                                                                              | LSAMP,                                      |
| chr2:141666036-141705031  | 38995      | Del  | 2.39E-03   | 0       | 1      |                                                                              | LRP1B,                                      |
| chr19:34934008-35059410   | 125402     | Amp  | 2.57E-96   | 0       | 1      |                                                                              | CCNE1,                                      |
| chr8:55315087-55564332    | 249245     | Amp  | 1.30E-07   | 0       | 1      |                                                                              | SOX17,                                      |
| chr4:1699241-1763076      | 63835      | Amp  | 1.65E-05   | 0       | 1      |                                                                              | TACC3,                                      |
| chr20:45338887-45497265   | 158378     | Amp  | 9.04E-04   | 2       | 1      | RP1-148H17.1.1, RP4-<br>569M23.2.1,                                          | ZMYND8,                                     |
| chr11:120642837-120763395 | 120558     | Amp  | 2.04E-02   | 0       | 1      |                                                                              | SC5DL,                                      |
| chr13:47887859-47909134   | 21275      | Del  | 9.90E-16   | 0       | 2      |                                                                              | LPAR6, RB1,                                 |
| chr8:128754508-129388953  | 634445     | Amp  | 3.70E-56   | 2       | 2      | RP11-1136L8.1.1, PVT1,                                                       | MYC, TMEM75,                                |
| chr8:121118433-121381535  | 263102     | Amp  | 4.58E-05   | 1       | 2      | RP11-760H22.2.1,                                                             | DEPTOR, COL14A1,                            |
| chr18:22116085-22479962   | 363877     | Amp  | 2.26E-03   | 0       | 2      |                                                                              | KCTD1, TAF4B,                               |
| chr7:141684869-142210398  | 525529     | Amp  | 3.47E-03   | 0       | 2      |                                                                              | PRSS1, AC233282.2,                          |
| chr3:109082368-109306668  | 224300     | Amp  | 4.89E-05   | 0       | 2      |                                                                              | CD47, RP11-631B21.2.1,                      |
| chr20:29703246-29808748   | 105502     | Amp  | 3.47E-04   | 1       | 2      | RP11-243J16.7.1,                                                             | TPX2, BCL2L1,                               |
| chr22:49443563-49691432   | 247869     | Del  | 1.01E-39   | 2       | 3      | AC000036.4.1,<br>AC002056.5.1,                                               | RABL2B, ACR, SHANK3,                        |
| chr3:75428992-76088380    | 659388     | Del  | 1.54E-03   | 1       | 3      | RP11-413E6.8.1,                                                              | FRG2C, ROBO2, ZNF717,                       |
| chr6:107028442-107428188  | 399746     | Amp  | 7.95E-03   | 2       | 3      | RP1-60O19.2.1, RP1-<br>60O19.1.1,                                            | AIM1, RTN4IP1, QRSL1,                       |
| chr17:43923270-44005064   | 81794      | Amp  | 2.82E-02   | 3       | 3      | RP11-357H14.7.1, RP11-<br>357H14.11.1, RP11-<br>357H14.17.1,                 | HOXB3, HOXB1, HOXB2,                        |
| chr19:63736798-63811651   | 74853      | Del  | 4.69E-05   | 0       | 4      |                                                                              | MZF1, CHMP2A, UBE2M,<br>TRIM28,             |
| chr11:77509837-77679169   | 169332     | Amp  | 9.28E-28   | 1       | 4      | RP11-705O3.1.1,                                                              | GAB2, USP35, ALG8,<br>KCTD21,               |
| chr12:25059809-25394729   | 334920     | Amp  | 2.66E-23   | 2       | 4      | RP11-713N11.4.1, RP11-<br>713N11.5.1,                                        | CASC1, LRMP, KRAS,<br>LYRM5,                |
| chr1:36338557-36480225    | 141668     | Amp  | 3.70E-03   | 0       | 4      |                                                                              | TRAPPC3, THRAP3,<br>MAP7D1, COL8A2,         |
| chr12:44143268-45289633   | 1146365    | Amp  | 3.38E-02   | 4       | 4      | RP11-96H19.1.1, RP11-<br>474P2.4.1, RP11-<br>352M15.1.1, RP11-<br>474P2.2.1, | SLC38A1, SLC38A2,<br>SCAF11, ARID2,         |
| chr10:78863997-79498631   | 634634     | Amp  | 3.78E-05   | 2       | 5      | RP13-39P12.3.1, RP11-<br>126H7.3.1,                                          | RPS24, POLR3A, DLG5,<br>KCNMA1, AL391421.1, |
| chr22:28450357-28767355   | 316998     | Amp  | 2.08E-04   | 1       | 5      | CTA-85E5.10.1,                                                               | CABP7, ZMAT5, ASCC2,<br>MTMR3, UQCR10,      |
| chr17:24137681-24279608   | 141927     | Amp  | 1.12E-02   | 0       | 5      |                                                                              | PHF12, FLOT2, ERAL1,<br>DHRS13, C17orf63,   |

\*Wide peak has no coding overlaps, but is proximal to known oncogene MECOM/EVI1

**Supplementary Table 2.** LncRNAs and coding genes intersecting with narrow focal regions identified by GISTIC (wide peak) in HGS-OvCa. Regions significant at  $q < 0.05$  and encompassing at most 5 coding genes are included in the table. Coordinates refer to the Hg18 human genome assembly.



| Rank | GENCODE 11 gene ID | Symbol          | RPKM   | Rank | GENCODE 11 gene ID | Symbol          | RPKM  |
|------|--------------------|-----------------|--------|------|--------------------|-----------------|-------|
| 1    | ENSG00000258486.1  | RN7SL1          | 8412.6 | 51   | ENSG00000247903.1  | RP11-421F16.3.1 | 112.9 |
| 2    | ENSG00000231486.3  | AC096579.7.1    | 3613.8 | 52   | ENSG00000231106.1  | AP000688.8.1    | 112.6 |
| 3    | ENSG00000251562.3  | MALAT1          | 1617.2 | 53   | ENSG00000259943.1  | RP1-39G22.7.1   | 111.9 |
| 4    | ENSG00000175061.9  | C17orf76-AS1    | 1216.5 | 54   | ENSG00000256894.1  | RP11-283G6.3.1  | 110.2 |
| 5    | ENSG00000260260.1  | RP11-304L19.5.1 | 1128.7 | 55   | ENSG00000251129.1  | RP11-734I18.1.1 | 106.8 |
| 6    | ENSG00000177410.8  | ZNFX1-AS1       | 666.7  | 56   | ENSG00000261594.1  | CTD-2562J17.3.1 | 104.6 |
| 7    | ENSG00000234741.2  | GAS5            | 571.3  | 57   | ENSG00000255750.1  | RP11-283G6.5.1  | 103.6 |
| 8    | ENSG00000258752.1  | RP11-356K23.1.1 | 513.2  | 58   | ENSG00000232335.1  | RP11-435D7.3.1  | 101.2 |
| 9    | ENSG00000214049.3  | UCA1            | 471.0  | 59   | ENSG00000225733.1  | FGD5-AS1        | 99.5  |
| 10   | ENSG00000250742.1  | RP11-834C11.4.1 | 448.8  | 60   | ENSG00000212694.4  | AC084018.1.1    | 98.0  |
| 11   | ENSG00000226956.1  | AP000432.2.1    | 406.5  | 61   | ENSG00000204054.5  | RP11-492E3.1.1  | 97.8  |
| 12   | ENSG00000245970.2  | KB-1208A12.3.1  | 360.0  | 62   | ENSG00000233016.1  | SNHG7           | 96.9  |
| 13   | ENSG00000232388.1  | LINC00493       | 359.0  | 63   | ENSG00000227121.1  | RP11-319F12.2.1 | 95.2  |
| 14   | ENSG00000245910.2  | SNHG6           | 347.7  | 64   | ENSG00000261183.1  | RP11-532F12.5.1 | 94.9  |
| 15   | ENSG00000237232.2  | ZNF295-AS1      | 278.9  | 65   | ENSG00000225138.2  | CTD-2228K2.7.1  | 94.6  |
| 16   | ENSG00000247516.2  | RP11-480D4.3.1  | 268.6  | 66   | ENSG00000232677.1  | AC092296.1.1    | 94.6  |
| 17   | ENSG00000255135.1  | RP11-111M22.3.1 | 256.7  | 67   | ENSG00000254615.1  | RP11-395G23.3.1 | 94.5  |
| 18   | ENSG00000237512.1  | RP11-790G19.2.1 | 234.8  | 68   | ENSG00000163364.4  | AC017048.3.1    | 92.9  |
| 19   | ENSG00000253518.1  | CTD-2031P19.4.1 | 205.1  | 69   | ENSG00000236618.1  | AC100748.2.1    | 91.8  |
| 20   | ENSG00000215808.2  | RP11-371I1.2.1  | 200.4  | 70   | ENSG00000255717.1  | SNHG1           | 91.0  |
| 21   | ENSG00000225969.1  | ABHD11-AS1      | 196.7  | 71   | ENSG00000228262.1  | AC073218.2.1    | 89.4  |
| 22   | ENSG00000245532.2  | NEAT1           | 183.1  | 72   | ENSG00000214548.8  | MEG3            | 88.1  |
| 23   | ENSG00000196421.3  | LINC00176       | 182.9  | 73   | ENSG00000254337.1  | RP11-865I6.2.1  | 86.5  |
| 24   | ENSG00000246067.2  | RP11-113K21.5.1 | 181.2  | 74   | ENSG00000236719.2  | RP11-522D2.1.1  | 86.4  |
| 25   | ENSG00000261344.1  | RP11-295M3.1.1  | 175.4  | 75   | ENSG00000229807.3  | XIST            | 86.1  |
| 26   | ENSG00000233901.1  | RP11-65J3.1.1   | 171.8  | 76   | ENSG00000254682.1  | RP11-660L16.2.1 | 84.9  |
| 27   | ENSG00000228598.1  | AC007001.4.1    | 169.7  | 77   | ENSG00000248538.2  | RP11-10A14.5.1  | 83.7  |
| 28   | ENSG00000246695.3  | RP11-877E17.2.1 | 168.7  | 78   | ENSG00000226363.2  | AC009336.24.1   | 82.5  |
| 29   | ENSG00000256234.1  | RP11-283G6.4.1  | 168.6  | 79   | ENSG00000167912.5  | RP11-25K19.1.1  | 81.0  |
| 30   | ENSG00000255026.1  | RP11-326C3.2.1  | 166.6  | 80   | ENSG00000206337.6  | HCP5            | 79.0  |
| 31   | ENSG00000261122.1  | RP11-352B15.1.1 | 162.2  | 81   | ENSG00000226197.1  | RP11-536O18.1.1 | 78.5  |
| 32   | ENSG00000260032.1  | RP4-550H1.6.1   | 157.8  | 82   | ENSG00000225484.2  | RP11-773D16.1.1 | 77.9  |
| 33   | ENSG00000259439.1  | RP11-89K21.1.1  | 157.4  | 83   | ENSG00000258616.1  | RP11-369C8.1.1  | 77.7  |
| 34   | ENSG00000259001.1  | RPPH1.1         | 157.4  | 84   | ENSG00000255509.1  | RP11-445F12.1.1 | 77.0  |
| 35   | ENSG00000126005.10 | MT1P3           | 157.4  | 85   | ENSG00000257588.1  | RP11-469H8.6.1  | 76.9  |
| 36   | ENSG00000258949.1  | RP11-857B24.5.1 | 157.3  | 86   | ENSG00000231295.1  | RP4-797C5.2.1   | 72.4  |
| 37   | ENSG00000225792.1  | AC004540.4.1    | 148.9  | 87   | ENSG00000233975.1  | RP11-288L9.1.1  | 72.0  |
| 38   | ENSG00000236081.1  | AC074389.9.1    | 148.4  | 88   | ENSG00000256916.1  | RP11-817J15.2.1 | 71.3  |
| 39   | ENSG00000260054.1  | RP11-611L7.1.1  | 148.2  | 89   | ENSG00000260708.1  | CTA-29F11.1.1   | 70.0  |
| 40   | ENSG00000257084.1  | U47924.27.1     | 147.5  | 90   | ENSG00000228288.2  | RP11-480I12.3.1 | 69.1  |
| 41   | ENSG00000204272.6  | RP11-622K12.1.1 | 144.2  | 91   | ENSG00000239467.1  | AC007405.6.1    | 68.5  |
| 42   | ENSG00000233461.1  | RP11-295G20.2.1 | 143.1  | 92   | ENSG00000234694.1  | RP1-92O14.3.1   | 68.3  |
| 43   | ENSG00000152931.6  | PART1           | 133.7  | 93   | ENSG00000249859.2  | PVT1            | 67.7  |
| 44   | ENSG00000240742.1  | RP11-465L10.7.1 | 132.8  | 94   | ENSG00000248275.1  | CTC-338M12.3.1  | 67.3  |
| 45   | ENSG00000253196.1  | RP11-706C16.7.1 | 131.3  | 95   | ENSG00000229941.1  | AC012499.1.1    | 67.0  |
| 46   | ENSG00000255198.2  | SNHG9           | 129.6  | 96   | ENSG00000232533.1  | AC093673.5.1    | 66.5  |
| 47   | ENSG00000229847.2  | EMX2OS          | 125.3  | 97   | ENSG00000236546.1  | RP1-118J21.5.1  | 66.4  |
| 48   | ENSG00000224259.1  | RP11-48O20.4.1  | 123.6  | 98   | ENSG00000237513.1  | RP11-325F22.2.1 | 66.1  |
| 49   | ENSG00000260552.1  | RP11-49I11.1.1  | 120.1  | 99   | ENSG00000236318.1  | AC019117.1.1    | 65.6  |
| 50   | ENSG00000253716.1  | RP13-582O9.5.1  | 116.9  | 100  | ENSG00000224189.2  | AC009336.23.1   | 65.3  |

**Supplementary Table 3.** GENCODE lncRNAs ranked by maximum expression in 407 TCGA ovarian tumors as determined by RNA-seq.
